# Supplementary material for: Development and Validation of a Bordetella pertussis Whole-Genome Screening Strategy
Source: J Immunol Res. 2020 Apr 2;2020:8202067. doi: 10.1155/2020/8202067 (PMC7154976; doi:10.1155/2020/8202067)
Supplement: Supplementary Materials — Supplementary Table 1: characteristics of the donor population. Supplementary Table 2: list of individual peptides of each megapool. Supplementary Table 3: list of antibodies used in the study. [file 8202067.f1.xlsx]

## Sheet: Sheet1
	Supplementary Table 1. Characteristics of the donor population
	Cohort	No. Samples	Age (range)	M/F
	wP	15	34 (27-43)	8/7
	aP	16	23 (22-26)	5/11
	Supplementary Table 2. List of individual peptides of each megapool.
	PT (4 vaccine antigens) (132 peptides)	ACT (54 peptides)	MS(01) Pertactin (24 peptides)	MS(02) Pertactin (24 peptides)	MS(01) FHA (22 peptides)	MS(02) FHA (24 peptides)	MS(01) PT (24 peptides)	MS(02) PT (22 peptides)	MS(01) FIM2/3 (24 peptides)	MS(02) FIM2/3 (24 peptides)
	Sequence	Sequence	Sequence	Sequence	Sequence	Sequence	Sequence	Sequence	Sequence	Sequence
	GADLIIANPNGISVNG	ATLMFRLVNPHSTSL	TAGLHFDQPMLEQLA	EAGRFKVLTVNTLAG	SIQVAYDSARSLLEL	ALQAGFLKSAGAMTV	KIIVLLNRHINEALQ	RYRDMYDALRRLLYM	AGLTVHIVGLRVDPA	LRVEFNRVHGFYIEV
	VVARLVKLQGAVSSKQ	LQAGYIPVNPNLSKL	GDTRLFITPGYRYRA	SGLFRMNVFADLGLS	IDPLRMKQVLSNLVG	RDAVRVDQARSLADI	LTWLAILAVTAPVTS	YMIYMSGLAVRVHVS	NPELISRTHFARFLV	EQLLDALAQYVRPLS
	GKPLADIAVVAGANRY	IPVNPNLSKLFGRAP	GYRYRAVDALLTNFH	SANTLLLVQTPLGSA	QVLSNLVGNAIKFTT	GSVVVRAQGNVTVGR	NSAFVSTSSSRRYTE	MNPLKDLRASLPRLA	GYCPDVQTVFNKYLG	PNGCRLDQTRRMLLI
	VVAGANRYDHATRRAT	SKERLDYLRQAGLVT	DALLTNFHLPQSTLL	YIADSGFYLDATLRA	PGTGLGLSISRRLVE	AVSVKVAKKLFLNGT	DNNFYGAASSYFEYV	SLPRLAFMAACTLLS	RRHGFLASRGSDFHS	KSTYMRQVALIALLA
	DHATRRATPIAAGARG	FEAVKVIGNAAGIPL	EPIRRAYAHAVAERY	GGGAYRAANGLRVRD	LRQQLDYLGQRVIAA	TRFSNKIRLMGPLQV	VGTLVRMAPVIGACM	LQRVNHFMASIVVVL	IDRRMRFLTKRLDIA	SFVPATRARVGRLDR
	SSDSGLGVRQLGSLSS	TADIDMFAIMPHLSN	AERYRFFSYGDAMFI	LYASYEYSKGPKLAM	RCILFGFTASAQMDE	GHDIHIINSAKLENT	EAMVLVYYESIAYSF	ASIVVVLRGASVATV	PNRDQVFFGATVLYM	TEAAAILAASTPASL
	RQLGSLSSPSAITVSS	MFAIMPHLSNFRDSA	LSLVVQEINGPRLAT	LFPIFADLTGRRVLV	FKPIGVDALRQRLNE	VKAQNITNKRAALIE	CHLLSVLPLALLGSH	ATVTIAIIWAGYKLL	IPFQRALRLCLRAAL	GLALAWAIAYRLLTH
	GQVRATSAGAMTVRDV	TDYLARTRRAASEAT	ASVMKLVTTWAALSE	GGAVAVRKTQALLQA	DGLVRTLAAQSAALE	RLTAAVALLNKLGRI	PLALLGSHVARASTP	YKLLFRHADVLDVVR	LCLRAALAAIASAAH	IAYRLLTHNRALTLF
	GFLKSAGAMTVNGRDA	ERIDLLWKIARAGAR	LLLQDLWALLRELRL	AGAWLVVAATDDRAV	KVLIIDDHPVLRFAV	VGKDLYLNAGARKDE	PATDHYYSNVTATRL	ADVLDVVRVVLAGLL	RAYKMVYATNPQTQL	NRALTLFATHYFELT
	VRLDGAHAGGQLRVSS	LWKIARAGARSAVGT	ALLRELRLRGVKQIG	DRSPLIVAISSSGVA	PVLRFAVRVLMEKEG	NRSVVRTVSAMEYFK	SRLCAVFVRSGQPVI	VVLAGLLIGASAEIA	RTVTMRYLASYVKKN	SRSYGIQVAQRAGVP
	VAELKSLDNISVTGGE	VITDFELEVRNALNR	IGDLVVDRSIFGQVA	GLLTLKALRALNEAD	IPNLVVLDIGIPKLD	EWSVNTLKNLDLGYQ	GKYWSMYSRLRKMLY	PAMLMGVPATPLAVC	TAIISSAAILNGLKV	DFMRRYWQRKPLLIR
	NISVTGGERVSVQSVN	EKIFVVSATGESQML	SPDALMVGFGAQRLL	RIHALMLAQARAGRR	EVIARLQSLGLPLRV	QEFAADLRTVYAKQA	MLYLIYVAGISVRVH	LLGIWFSIAFLALFP	CLDLLVHLGIKREHI	RKPLLIRQAIPGFKP
	RVSVQSVNSASRVAIS	GYVFYENRAYGVAGK	RLLFTPDAAARKWVP	RRVVRLKGGDAFIFG	LRVLVLTGQPPSLFA	AVRLQAIQPGRVTLA	GARRSRVRALAWLLA	IAFLALFPVALLAMR	IKREHIYVVDSRGVI	DLHHDAVSALLQQFR
	IDVRGGSTVAANSLHA	ENRAYGVAGKSLFDD	FSLYRLALSQPEYAS	ELEYLRAHGVPYEVV	ENLHEVINAAKAVMA	GRVTLAKALSAALGA	RALAWLLASGAMTHL	PVALLAMRIMIRRDD	PEMVKTMAAQPLILA	QQFRFIPDARLDDIM
	RSMTLGIVDTTGDLQA	LEMTRQVLHAGARQD	LMPEFISSLAIAGVD	GVGQLDYVTARLLEH	STLISVLSNRELTVL	ALAAVLVNPHIFTRI	VPYVLVKTNMVVTSV	FRLIWLYLRMRWLSR	PRLIVQIAPAVAQAA	YDVFLLQASGRRRWR
	SASRARIDSTGSVGIG	AQAVAAAQRLVHAIA	VRAVAGYVLGASGKR	MMVRFFVSIGVLAWA	KTRLLQKLNATSLVE	LFETRIKFIDQSKFY	VAMKPYEVTPTRMLV	GADLVRTWRVQGIAF	FVYHSGQLMRPLFQQ	QKDLSLQPDLPLKIL
	KVAKKLFLNGTLRAVN	AAQRLVHAIALMTQF	PLIRHKLGIMRRADL	LRMLGLFAYDKISGE	NLYRLVFSHVRGMLV	GDQVSLKAAKSVNLM	RAVFMQQRPLRMFLG	PFCRALDASYNARLN	MRPLFQQAKQAPKRV	ISIGFRAPSQAMLAR
	SVVSDAALVADGGPIV	VHAIALMTQFGRAGS	KVTVVPILRAGIGML	RALASVRRTREALYD	FQQFNVANPGVVFNN	REDLMKLNGKVLSTK	RPLRMFLGPKQLTFE	AEVRRQLLAHVRRMD	SVIEMRIKKFGLRMV	LDRLRFDEALAARFL
	QRIEAQRIENRGTFQS	ETVSGFFRGSSRWAG	DGVLSLIPGAKVSVV	PWQAISIAGVTGLLL	KGADLIIANPNGISV	TKTTLGLEQTFRLRV	THLYKNFTVQELALK	DYEYVITHSFSAVGK	ALNVLMLPNQTLFVT	SGALVLDRRSRMLYR
	AAQVTQRGGAANLTSR	TGGTVELASSIALAL	QRLALIVDPMLATGG	ASLVGLTRTRLELLA	TGLGYFDVVARLVKL	WRRRLGVAALGAAML	CLTAFMSGRSLVRAC	RQALAYLQRQRAQLA	EEMLRFGVMPKIALL	YPALRAALILAASPV
	HDTRFSNKIRLMGPLQ	ELASSIALALAAARG	MSLSRIVKAAPLRRT	IRLIKLLGMAFGALL	VARLVKLQGAVSSKQ	AAMLASLAPAARASL	FDTMLGFAISAYALK	FSMMILGADPRQLRR	TDSSRKMAHARKLVA	LILAASPVLPALAND
	IRLMGPLQVNAGGAVS	IALALAAARGVTSGL	IRRFLGTVTVKAGKL	GALLFLTLAVLVFTI	GAVKIASASSVGNLA	ARASLVITGTRVIYN	NNKKLLHHILPILVL	IQERGFLATPVTLAL	HARKLVAERAPHLEV	PSTLNHIKVVQLPKI
	TSRGGFDNEGKMESNK	MEIYGLVQQSHYADQ	GAVVHLQRATIRRGD	LAVLVFTITIAVAFW		EVQVPFFLTPPLARV	LPILVLALLGMRTAQ		ITYNMLKMTGSNGIA	KGVEFRLANLNGQHI
	FTVQAQRIDNSGTMAA	YGYEGDALLAQLYRD	GKALLYRVLPEPVKL	IGLVLFFLVRRDLVD		HGVLQLTIRSRLKLF	AELQTYLRQITPGWS		GPILLGSARPVHILT	PESWLRQVLGSVLET
	PHLRNTGQVVAGHDIH	DALLAQLYRDKTAAE
	VVAGHDIHIINSAKLE	VSAVLSTVGAAVSIA
	IINSAKLENTGRVDAR	STVGAAVSIAAAASV
	NDIALDVADFTNTGSL	AVSIAAAASVVGAPV
	DFTNTGSLYAEHDATL	VGAPVAVVTSLLTGA
	ILPVAEGTLRVKAKSL	LNGILRGVQQPIIEK
	LRVKAKSLTTEIETGN	PIIEKLANDYARKID
	PGSLIAEVQENIDNKQ	ANSDGLRKMLADLQA
	VANEANALLWAAGELT	LRKMLADLQAGWNAS
	LWAAGELTVKAQNITN	RPALTFITPLAAPGE
	VKAQNITNKRAALIEA	TIDLAKVVSQLVDAN
	AVALLNKLGRIRAGED	KVVSQLVDANGVLKH
	MHLDAPRIENTAKLSG	GVLKHSIKLDVIGGD
	GKKAGTIAAPWYGGDL	GDDVVLANASRIHYD
	VGKDLYLNAGARKDEH	ERFNVRKQLNNANVY
	ELLDYLLDQNRYEYIW	ENVQYRHVELARVGQ
	QNRYEYIWGLYPTYTE	GAGDDVFLQDLGVWS
	RGHTLESAEGRKIFGE	ALNLFSVDHVKNIEN
	EGRKIFGEYKKLQGEY	SVDHVKNIENLHGSR
	GGMDAETKEVDGIIQE	KNIENLHGSRLNDRI
	EVDGIIQEFAADLRTV	DYSAMIHPGRIVAPH
	FAADLRTVYAKQADQA	SREWVRKASALGVDY
	VAQRYKSQIDAVRLQA	NVENVIGTSMKDVLI
	IDAVRLQAIQPGRVTL	GRIGLGILADLGAGR
	IQPGRVTLAKALSAAL	GILADLGAGRVDKLG
	GAEIAFYPKEQTVLAA	DDWFFQDAANAGNLL
	GAIHNGENAAQNRGRP	ARDDVLIGDAGANVL
	DALAAVLVNPHIFTRI	HRVEIIHAANQAVDQ
	NPHIFTRIGAAQTSLA	AGIEKLVEAMAQYPD
	LASLASLDAAQGLEVS	RVPDTLMQSLAVNWR
	AARVAGDNYFDTTLVR
	GKPLADIAVIAGANRY
	HADDGTIVITGTITDT
	VQVRISNLNDSKITMG
	TMRYLASYVKKNGDVE
	EASAITTYVGFSVVYP
	ANDGTIVITGSISDQT
	FRLANLNGQHIRMGTD
	SKSYTLRYLASYVKKP
	DAAQITSYVGFSVVYP
	TTLAMALGALGAAPAA
	ALGAAPAAHADWNNQS
	HADWNNQSIVKTGERQ
	IVKTGERQHGIHIQGS
	HGIHIQGSDPGGVRTA
	GRQAQGILLENPAAEL
	GIRRFLGTVTVKAGKL
	VTVKAGKLVADHATLA
	NVGDTWDDDGIALYVA
	DGIALYVAGEQAQASI
	GEQAQASIADSTLQGA
	ADSTLQGAGGVQIERG
	GGVQIERGANVTVQRS
	ANVTVQRSAIVDGGLH
	PEDLPPSRVVLRDTNV
	VVLRDTNVTAVPASGA
	TAVPASGAPAAVSVLG
	GHITGGRAAGVAAMQG
	AGVAAMQGAVVHLQRA
	AVVHLQRATIRRGDAP
	TIRRGDAPAGGAVPGG
	AGGAVPGGAVPGGAVP
	AVPGGAVPGGFGPGGF
	GPVLDGWYGVDVSGSS
	VELAQSIVEAPELGAA
	EAPELGAAIRVGRGAR
	SAPHGNVIETGGARRF
	ETGGARRFAPQAAPLS
	APQAAPLSITLQAGAH
	AQGKALLYRVLPEPVK
	SIGPLDVALASQARWT
	LASQARWTGATRAVDS
	GATRAVDSLSIDNATW
	LSIDNATWVMTDNSNV
	AEAGRFKVLTVNTLAG
	LTVNTLAGSGLFRMNV
	RNSGSEPASANTLLLV
	PAGRELSAAANAAVNT
	LFDDGIRRFLGTVTVK
	AGGGVPGGAVPGGAVP
	VYRYDSRPPEDVFQNG
	NVLDHLTGRSCQVGSS
	NSAFVSTSSSRRYTEV
	SSRRYTEVYLEHRMQE
	YLEHRMQEAVEAERAG
	SYFEYVDTYGDNAGRI
	YGDNAGRILAGALATY
	LAGALATYQSEYLAHR
	QSEYLAHRRIPPENIR
	RIPPENIRRVTRVYHN
	RVTRVYHNGITGETTT
	GITGETTTTEYSNARY
	PNPYTSRRSVASIVGT
	WSERAGEAMVLVYYES
	GEAMVLVYYESIAYSF
	SVASIVGTLVRMAPVM
	YYSNVTATRLLSSTNS
	RLCAVFVRSGQPVIGA
	SGQPVIGACTSPYDGK
	CTSPYDGKYWSMYSRL
	YWSMYSRLRKMLYLIY
	RKMLYLIYVAGISVRV
	HVSKEEQYYDYEDATF
	TQHGSPYGRCANKTRA
	HYYSKVTATRLLASTN
	SRLCAVFVRDGQSVIG
	VHVSKEEQYYDYEDAT
	VYKYDSRPPEDVFQNG
	Supplementary Table 3. List of antibodies used in the study
	Antibody	Fluorochrome	Clone	Host	Vendor	Catalog #
	CD3	AF700	UCHT1	mouse	eBioscience	56-0038-42
	CD4	APCef780	RPA-T4	mouse	eBioscience	47-0049-42
	CD8	V500	RPA-T8	mouse	BD Biosciences	560774
	CD14	V500	M5E2	mouse	BD Biosciences	561391
	CD19	V500	HIB19	mouse	BD Biosciences	561121
	CD25	FITC	M-A251	mouse	BD Biosciences	555431
	CD69	BV605	FN50	mouse	BD Biosciences	562989
	CD45RA	ef450	HI100	mouse	eBioscience	48-0458-42
	CCR7	PerCP/Cy5.5	G043H7	mouse	BioLegend	353220
	PD-L1	PE	29E.2A3	mouse	BioLegend	329706
	OX40	PE/Cy7	Ber-ACT35	mouse	BioLegend	350012
	4-1BB	APC	4B4-1	mouse	BioLegend	309810
